# Supplementary material
Source: ML conference proceedings conference paper supplement (https://proceedings.neurips.cc/paper_files/paper/2019/hash/65b1e92c585fd4c2159d5f33b5030ff2-Abstract.html)

# UCB algorithm

Bias =  $(-0.291, -0.363, -0.006)$

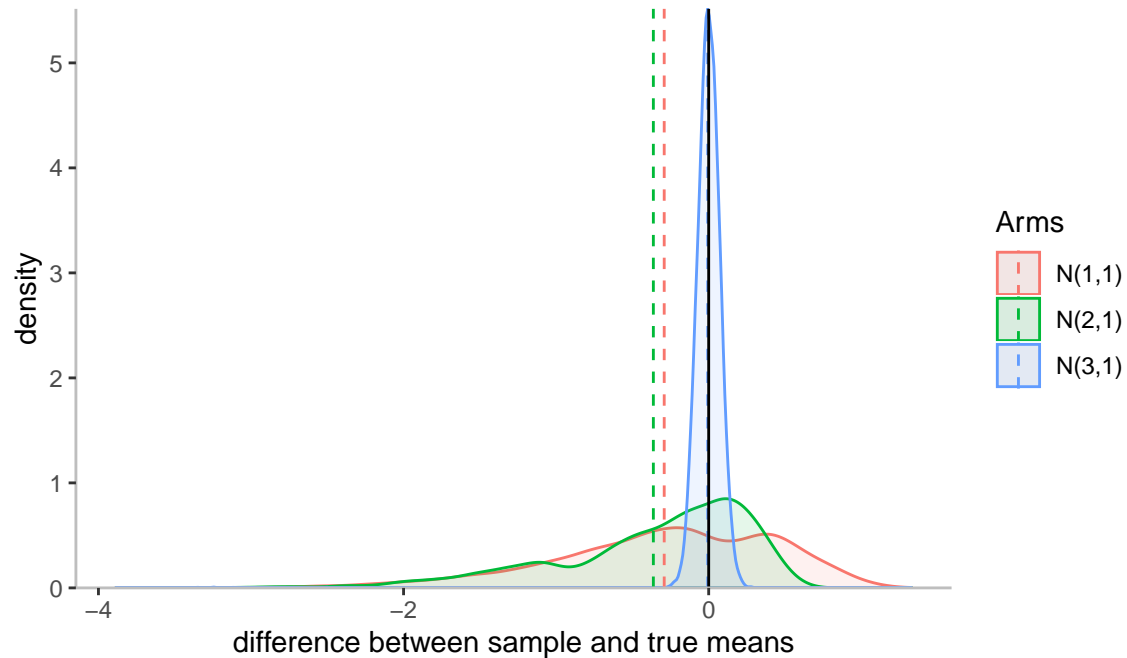

Supplement: Supplementary file [file 65b1e92c585fd4c2159d5f33b5030ff2-Supplemental.zip]
