# Supplementary material
Source: ML conference proceedings conference paper supplement (https://proceedings.neurips.cc/paper_files/paper/2019/hash/65b1e92c585fd4c2159d5f33b5030ff2-Abstract.html)

Estimate largest mean  
Bias = (0.001, 0.002, 0.006)

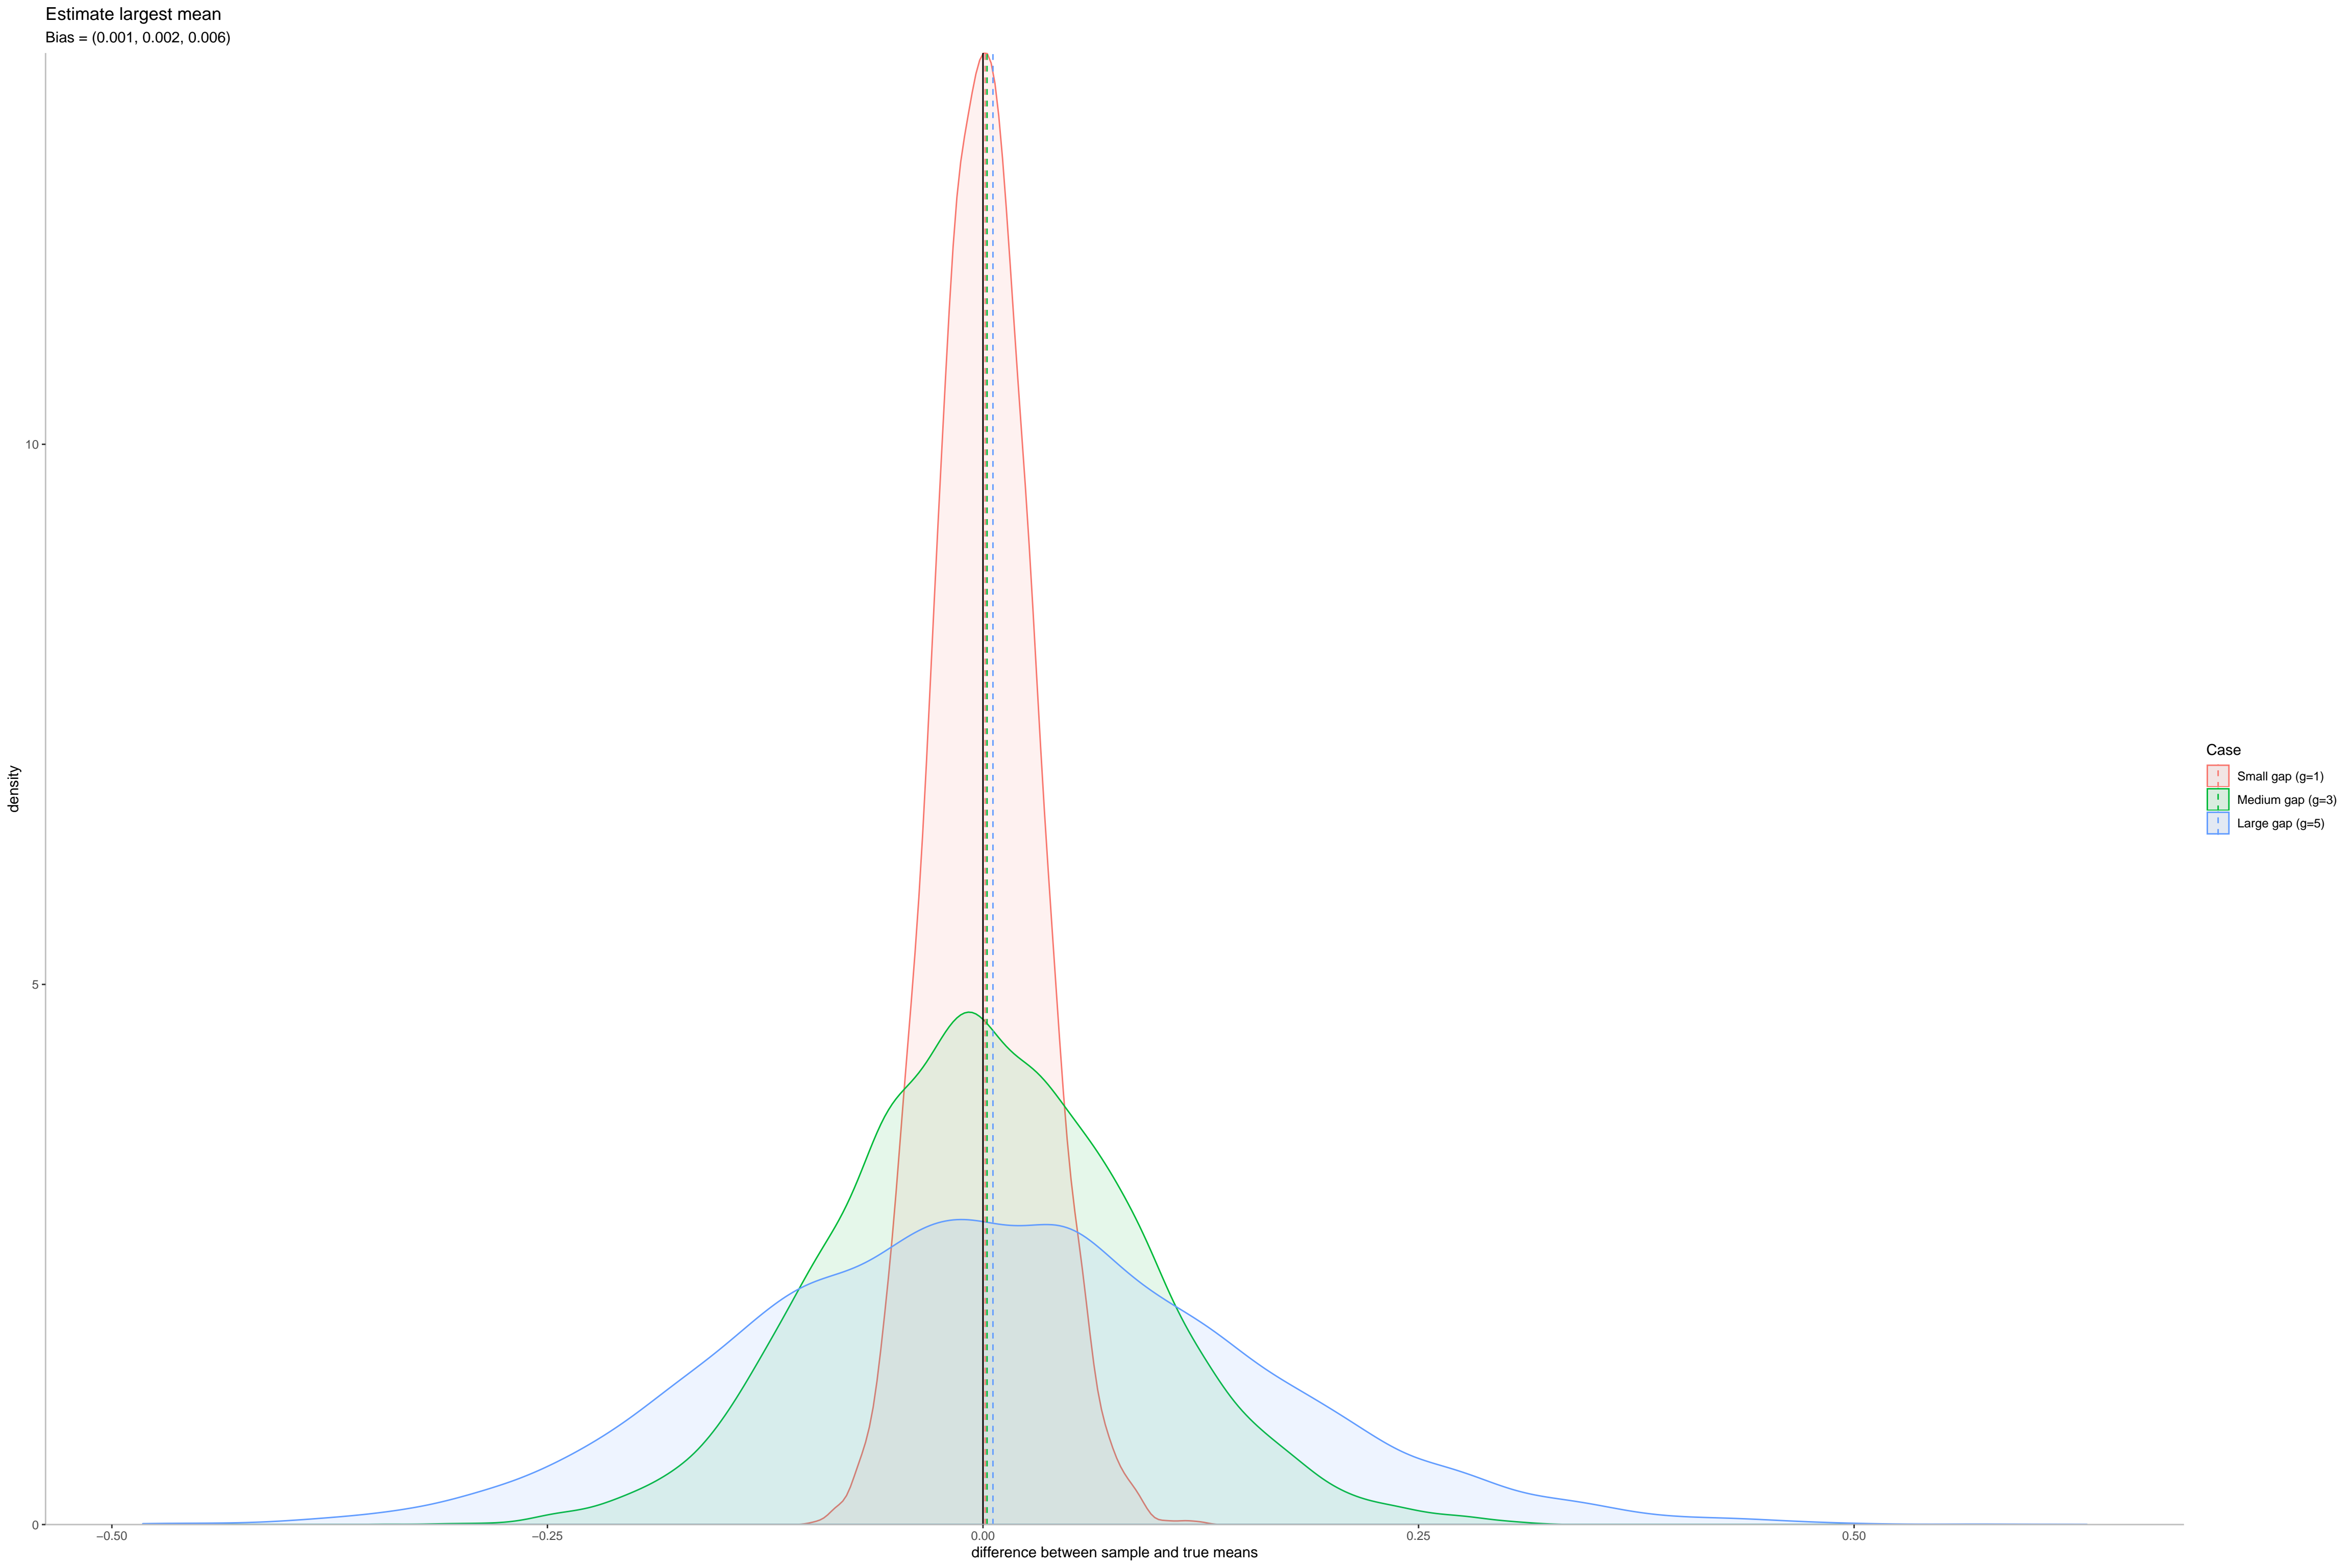

Estimate largest mean  
Bias = (0.001, 0.002, 0.006)



Supplement: Supplementary file [file 65b1e92c585fd4c2159d5f33b5030ff2-Supplemental.zip]
